# Supplementary material for: Delta/Notch-like Epidermal Growth Factor-Related Receptor (DNER), a Potential Prognostic Marker of Gastric Cancer Regulates Cell Survival and Cell Cycle Progression
Source: MDPI journal article supplement (doi:10.3390/ijms241210077), 2023-06-13
Supplement: s1 [file s1]

Supplemental Table S1

**Table of Primer**

| <b>Primer</b> | <b>Sequences</b>                                                    |
|---------------|---------------------------------------------------------------------|
| DNER F        | GTGCCTGGCAGAATACAAAGG                                               |
| DNER R        | ATGATGTAGAGGGAGTGCCG                                                |
| NOTCH1 F      | CTGAAGAACGCTTCAGACGG                                                |
| NOTCH1 R      | ATCAGAGCGTGAGTAGCGG                                                 |
| GAPDH F       | TGATGACATCAAGAAGGTGGTGAAG                                           |
| GAPDH R       | TCCTTGGAGGCCATGTGGGCCAT                                             |
| <b>siRNA</b>  |                                                                     |
| siDNER        | Sense-GCUUUGCCAGUCCAAGAUU                                           |
|               | Anti sense-GCUUUGCCAGUCCAAGAUU                                      |
| siP53         | Sense- AAGGAAAUUUGCGUGUGGAGUUU                                      |
|               | Anti sense-ACUCCACACGCAAUUUCCUUUU                                   |
| siSMAD4       | Sense-AAGAUCUACCCAAGUGCAUUAU                                        |
|               | Antisense-AUAUGCACUUGGGUAGAUCUU                                     |
| <b>shRNA</b>  |                                                                     |
| shDNER        | Top: 5'-CCGGGCTTTGCCAGTCCAAGATTGACTCGAGTCAATCTTGGACTGGCAAAGCTTTTTG  |
|               | Bot: 5'-AATTCAAAAAGCTTTGCCAGTCCAAGATTGACTCGAG TCAATCTTGGACTGGCAAAGC |
