# Supplementary material for: Delta/Notch-like Epidermal Growth Factor-Related Receptor (DNER), a Potential Prognostic Marker of Gastric Cancer Regulates Cell Survival and Cell Cycle Progression
Source: MDPI journal article supplement (doi:10.3390/ijms241210077), 2023-06-13
Supplement: s1 [file s1]

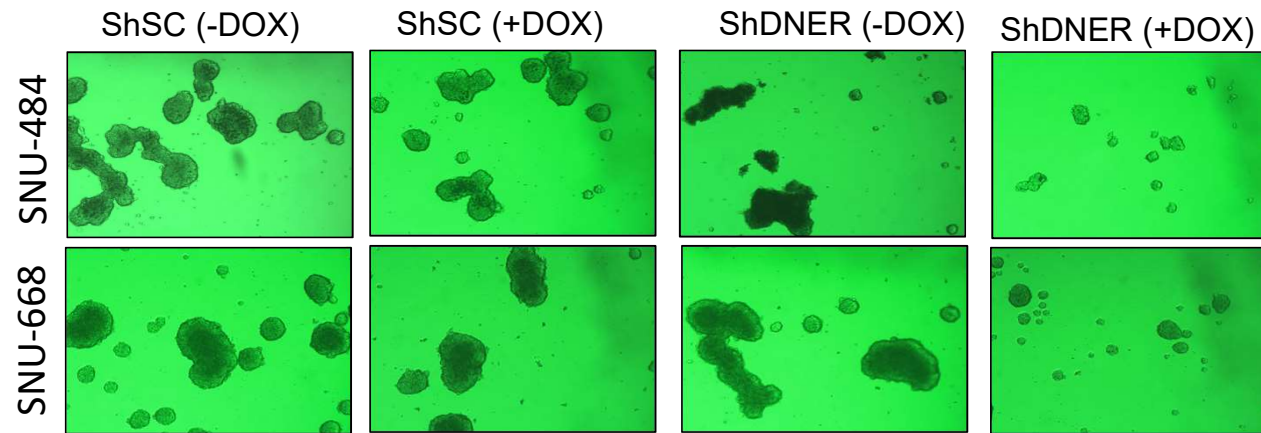

**Supplemental Figure S1.** Phase contrast microscope images (20x) of spheroid-cultured SNU-484 and SNU-668 cells expressing shSC or shDNER for 14 days. SNU-484 and SNU-668 cells were transduced with lentiviruses expressing shSC or shDNER and were then selected by puromycin (2  $\mu$ g/ml) treatment for seven days. The expression of shSC or shDNER was induced by doxycycline treatment (10 ng/ml).

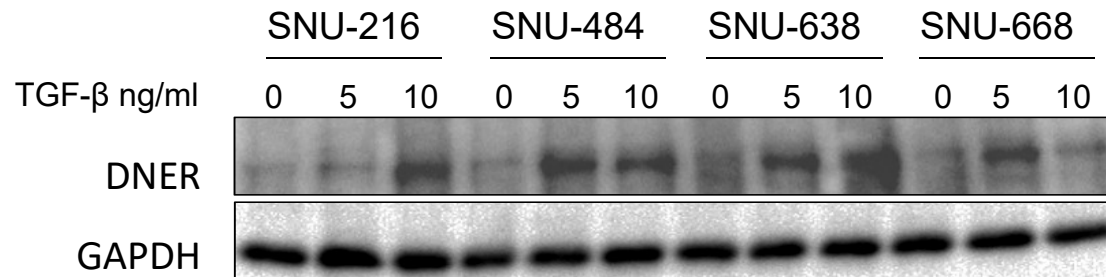

**Supplemental Figure S2.** DNER protein level in SNU-216, SNU-484, SNU-638 and SNU-668 cells treated with an indicated amount of TGF- $\beta$  for three days was examined by western blotting. GAPDH was used as a loading control.
